# Supplementary material
Source: PubMed Central journal article supplement (PMC3540168)
Supplement: NIHMS422103-supplement-1.pdf [file NIHMS422103-supplement-1.pdf]

# Endothelial Apelin-FGF Link Mediated by MicroRNAs 424 and 503 is Disrupted in Pulmonary Arterial Hypertension

Jongmin Kim, Yujung Kang, Yoko Kojima, Janet K. Lighthouse, Xiaoyue Hu, Micheala A. Aldred, Danielle L. McLean, Hyekyung Park, Suzy A. Comhair, Daniel M. Greif, Serpil C. Erzurum, Hyung J. Chun

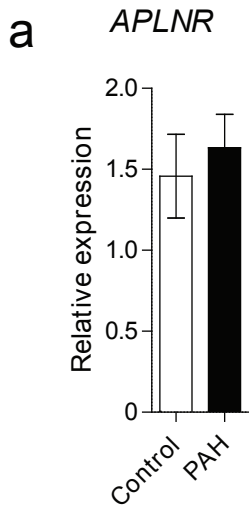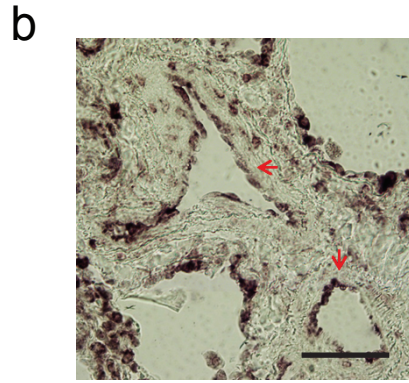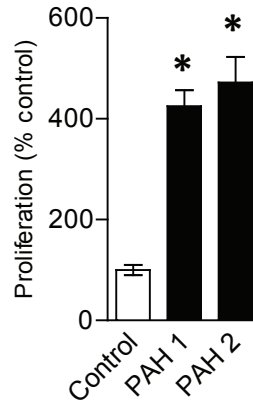

**Supplementary Figure 1.** a) Total mRNA levels of *APLNR* in normal and PAH PAECs. b) *In situ* hybridization for *APLNR* in a normal lung. Scale bar = 50  $\mu$ m.

**Supplementary Figure 2.** Proliferation rate of PAECs from control and PAH patients. \*  $P < 0.001$ .

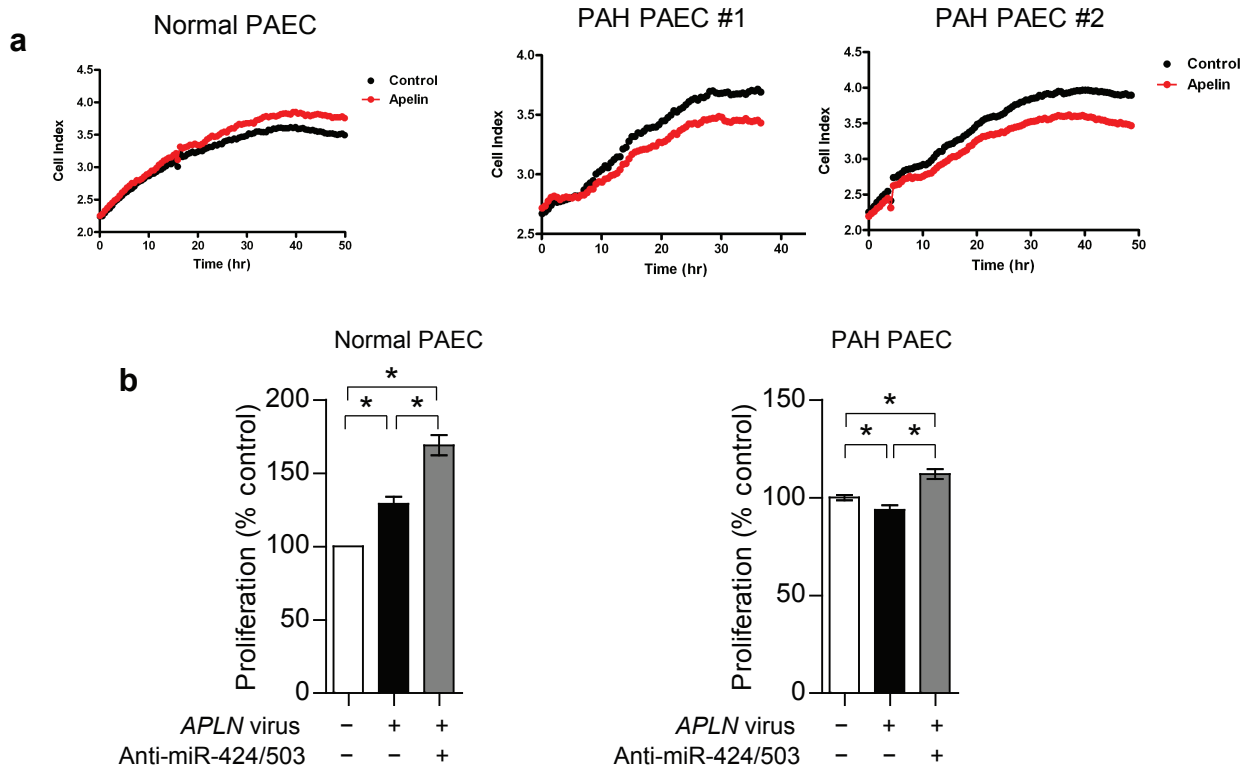

**Supplementary Figure 3.** a) Proliferation of normal and PAH PAECs in response to stimulation with apelin-13 peptide. b) Proliferation of normal and PAH PAECs in response to *APLN* overexpression in conjunction with concurrent miR-424 and miR-503 inhibition with anti-miR-424/503 transfection. \* $P < 0.05$ .

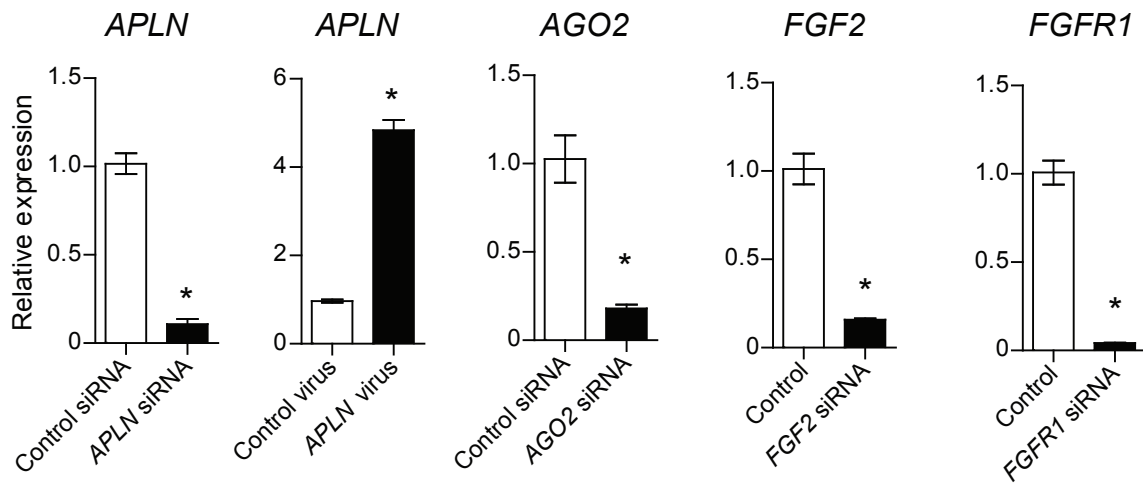

**Supplementary Figure 4.** Knockdown and overexpression efficacy of *APLN*, *AGO2*, *FGF2* and *FGFR1* in PAECs. \* $P < 0.001$ .

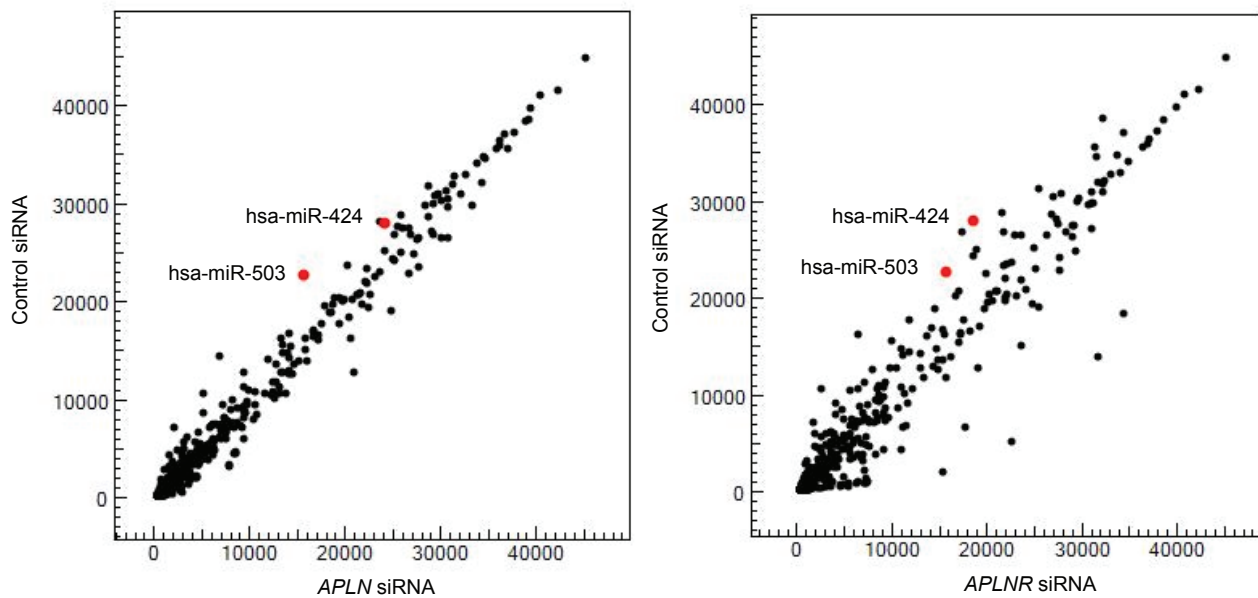

**Supplementary Figure 5.** MicroRNA microarray analysis with *APLN* or *APLNR* knockdown in PAECs. MiR-424 and miR-503 are shown in red.

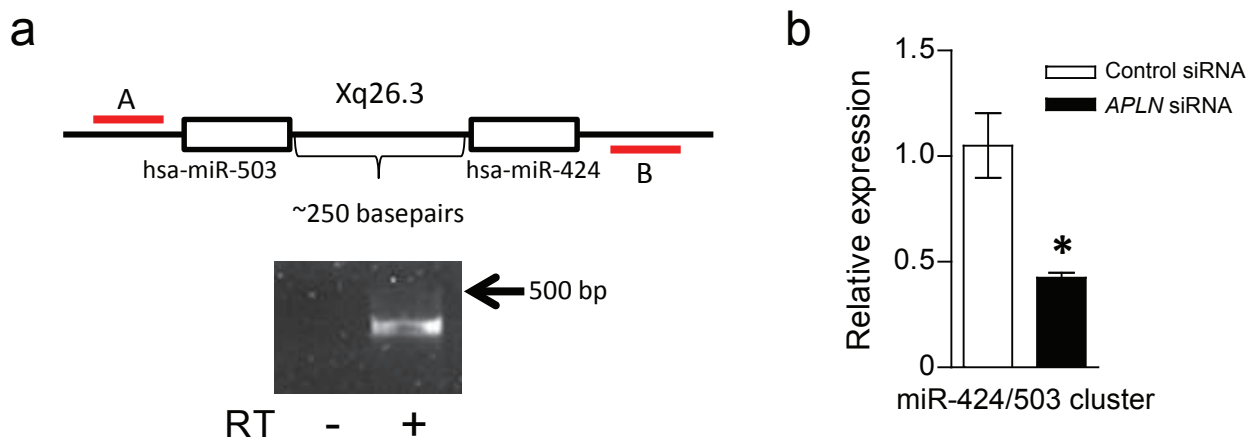

**Supplementary Figure 6.** a) Transcription of miR-424 and miR-503 as a single transcript. PCR using human PAEC cDNA and two primers flanking miR-424 and miR-503 (designated A and B). No reverse transcriptase (RT) control is also shown. b) Quantitative PCR using primers A and B in PAECs with *APLN* knockdown. \* $P < 0.001$ .

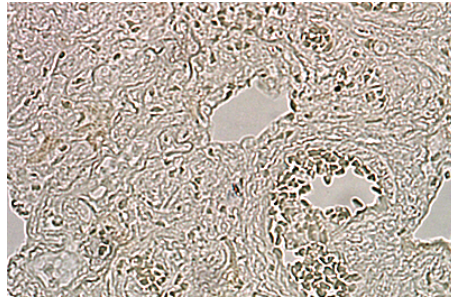

**Supplementary Figure 7.** Scrambled control for *in situ* hybridizations of human lung sections.

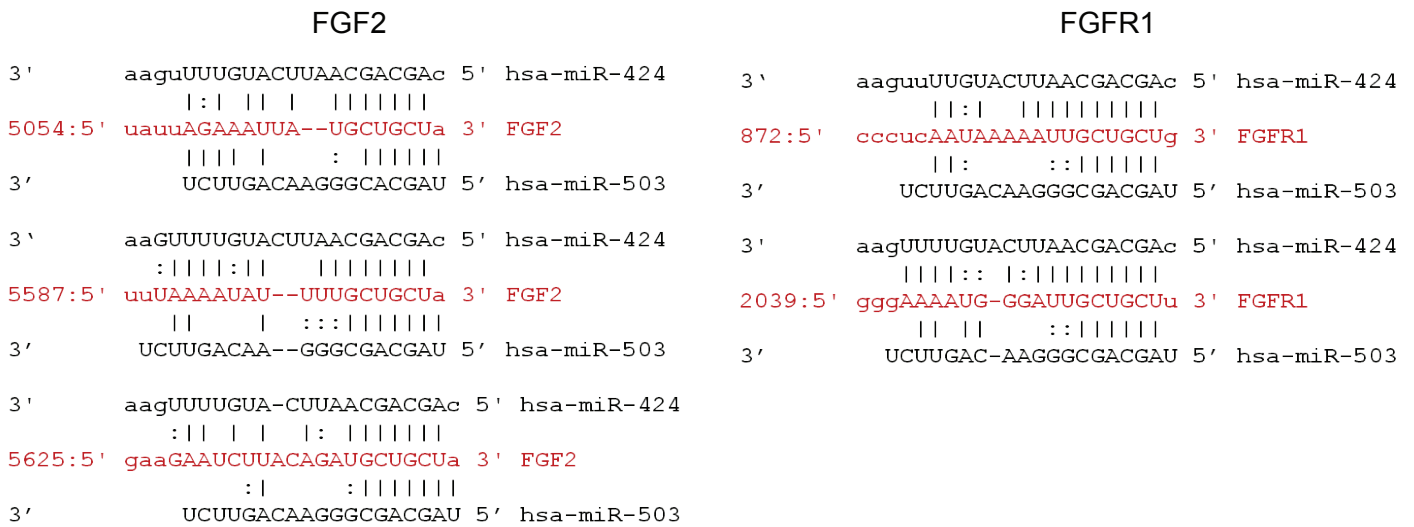

**Supplementary Figure 8.** Predicted target sequences of *FGF2* and *FGFR1* 3' UTRs targeted by miR-424 and miR-503.

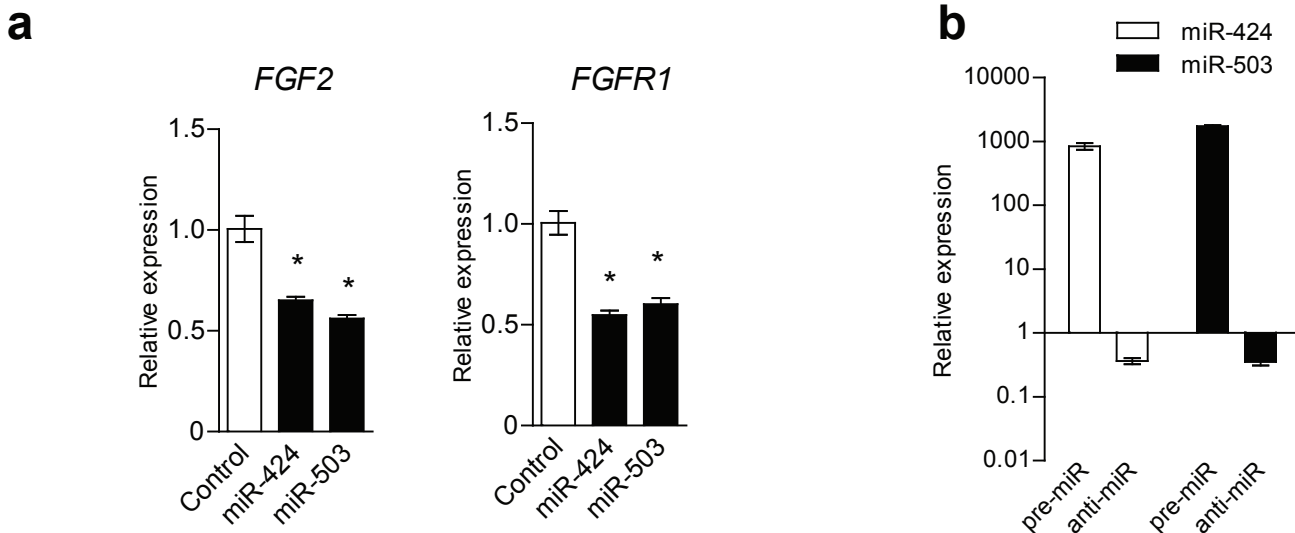

**Supplementary Figure 9.** a) *FGF2* and *FGFR1* mRNA expression levels in response to miR-424 or miR-503 overexpression in normal PAECs. \* $P < 0.01$  vs. control. b) Levels of miRNA achieved with overexpression or knockdown in PAECs.

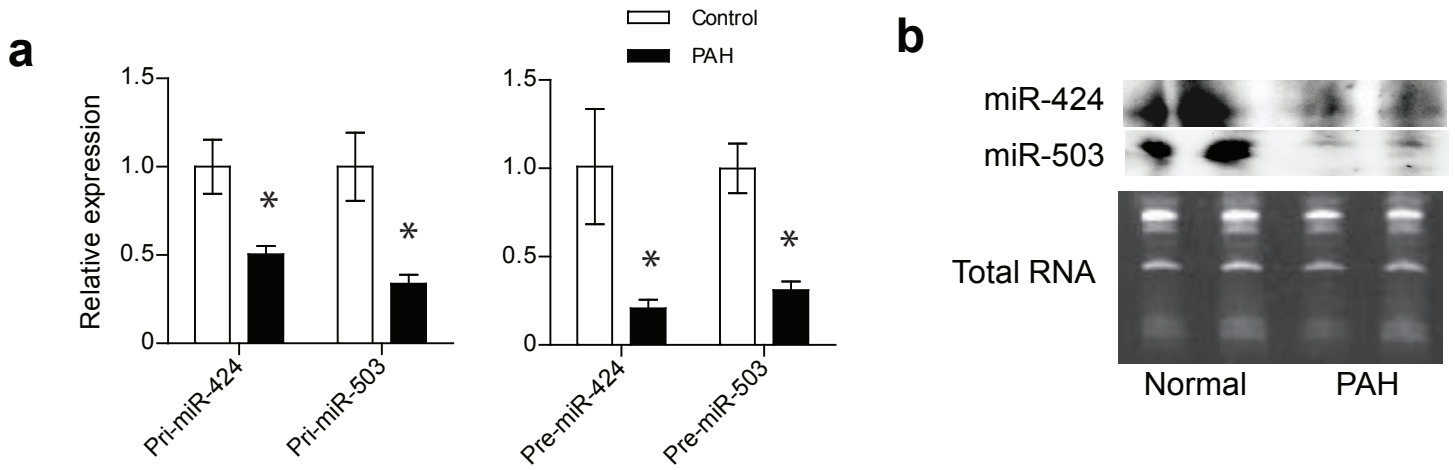

**Supplementary Figure 10.** a) Transcript levels of pri- and pre-forms of miR-424 and miR-503 in normal and PAH PAECs. b) Northern blots of miR-424 and miR-503 in normal and PAH PAECs. \* $P < 0.01$ .

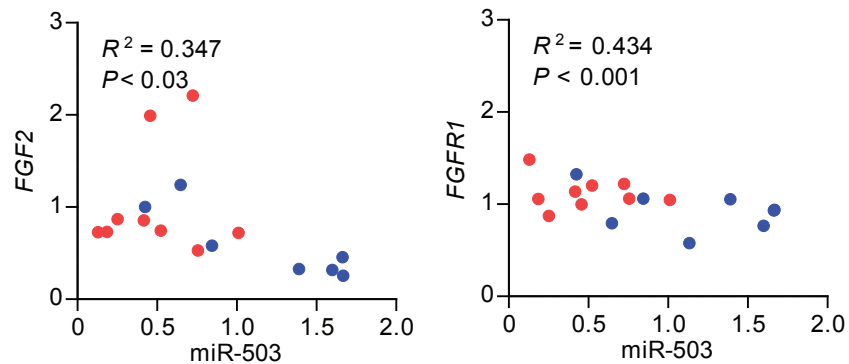

**Supplementary Figure 11.** Correlation of miR-503 in normal and PAH PAECs with *FGF2* and *FGFR1* mRNA levels.

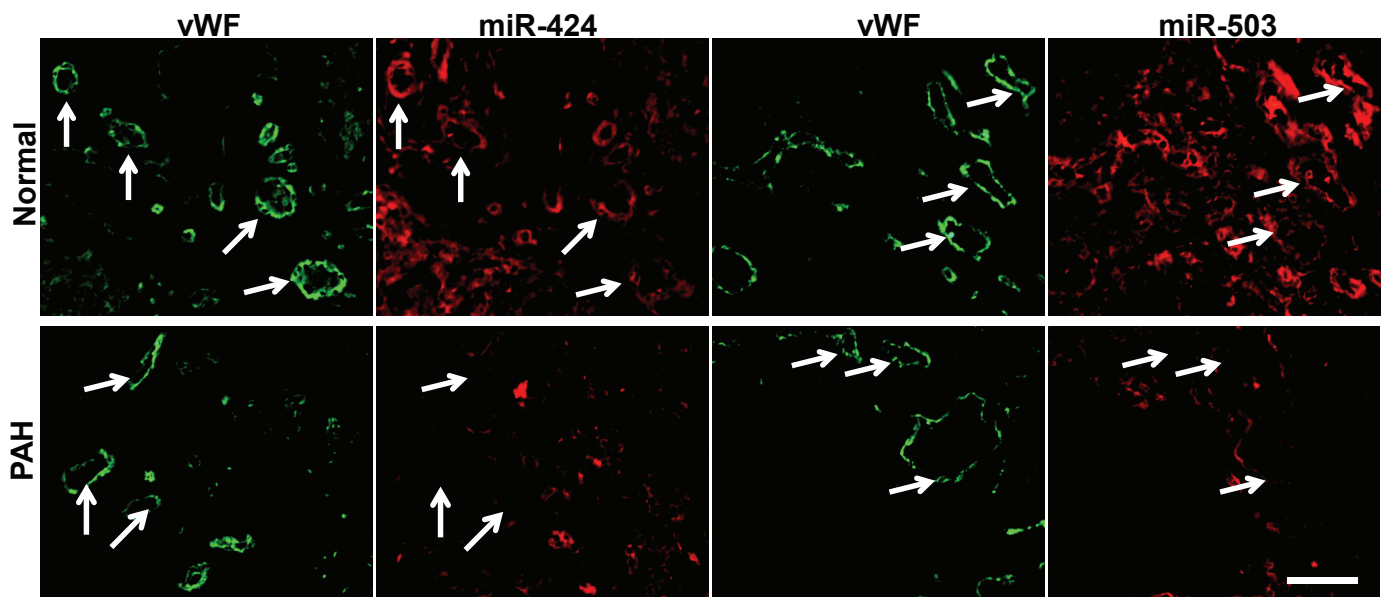

**Supplementary Figure 12.** Microvascular endothelial expression of miR-424 and miR-503 in normal and PAH patient, as demonstrated by costaining with von Willebrand factor. Endothelial layer is designated by white arrows. Scale bar = 70  $\mu\text{m}$ .

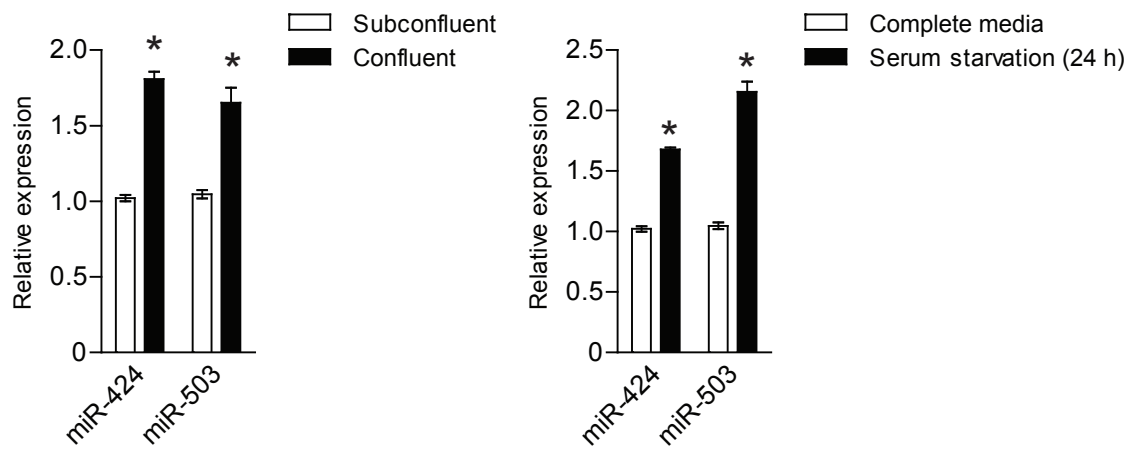

**Supplementary Figure 13.** Expression levels of miR-424 and miR-503 with varying cell confluent conditions and serum starvation in PAECs. \* $P < 0.001$ .

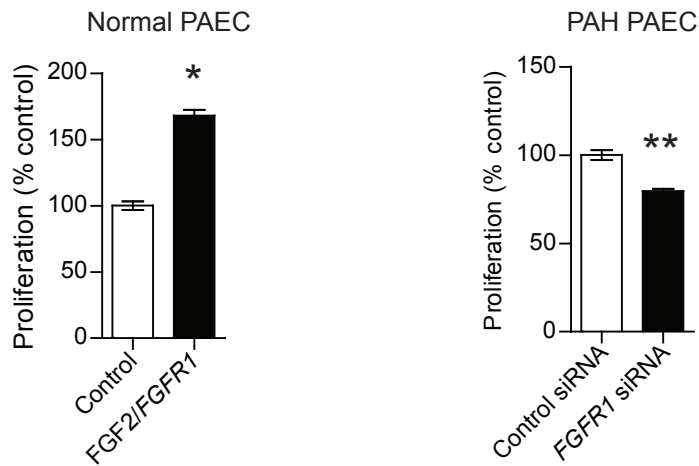

**Supplementary Figure 14.** Normal PAEC proliferation in response to augmentation of FGF signaling via FGF2 stimulation and *FGFR1* overexpression, and PAH PAEC proliferation in response to knockdown of *FGF2* and *FGFR1*. \* $P < 0.001$  and \*\* $P < 0.05$ .

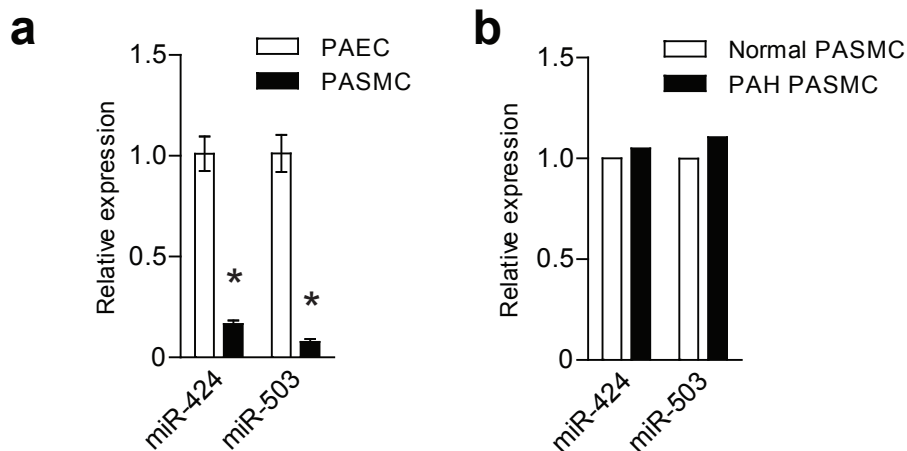

**Supplementary Figure 15.** a) Expression levels of miR-424 and miR-503 in PAECs and PASCs. \* $P < 0.001$ . b) Relative expression of miR-424 and miR-503 in PASCs of normal and PAH patients.

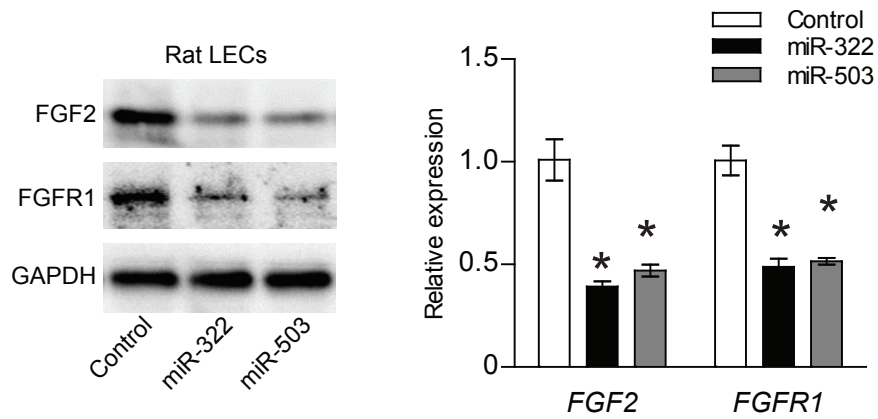

**Supplementary Figure 16.** FGF2 and FGFR1 protein (left) and mRNA (right) expression in response to overexpression of rat miR-322 or miR-503 mimics in isolated rat LECs. \* $P < 0.01$ .

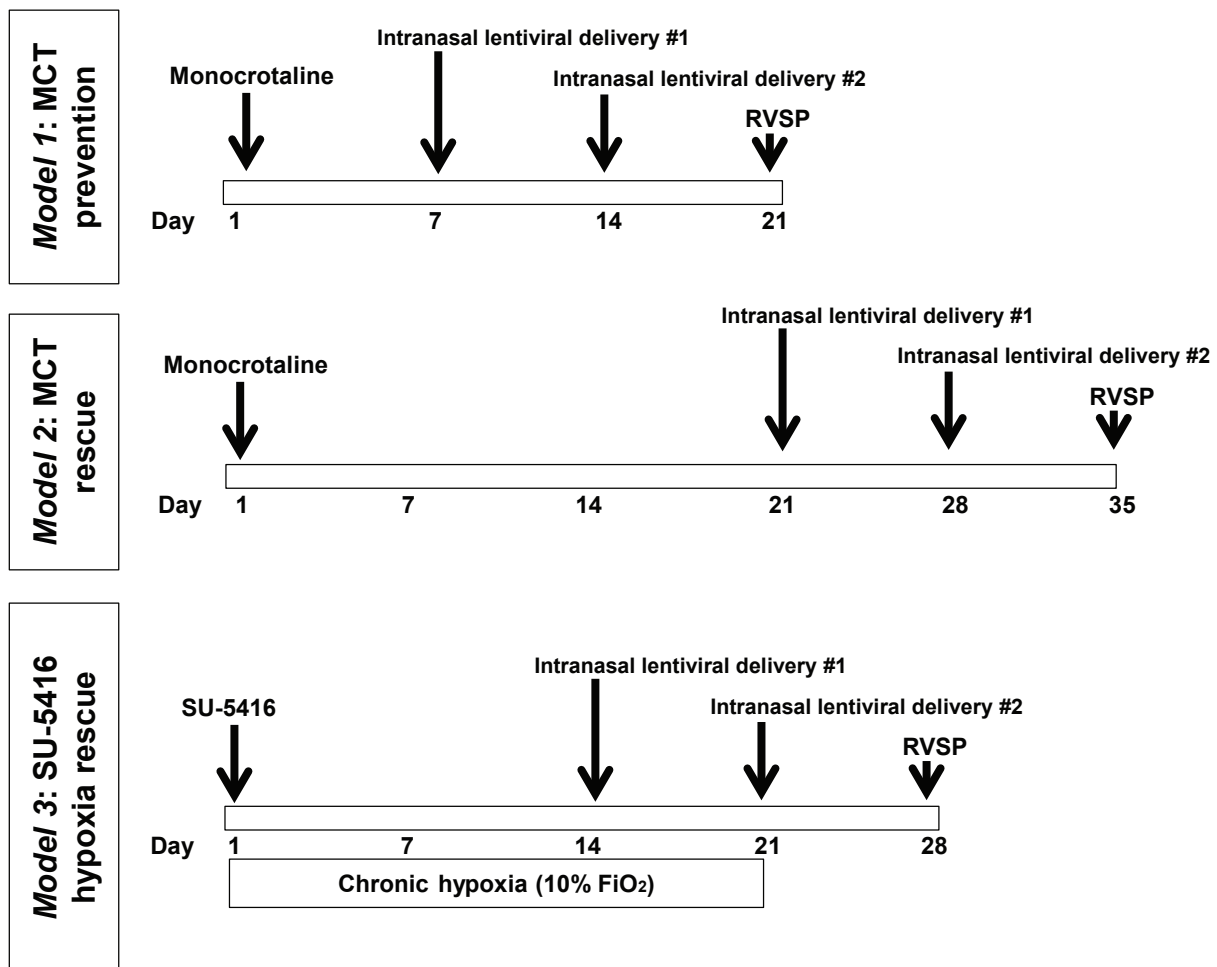

**Supplementary Figure 17.** Schematic of experimental pulmonary hypertension models used.

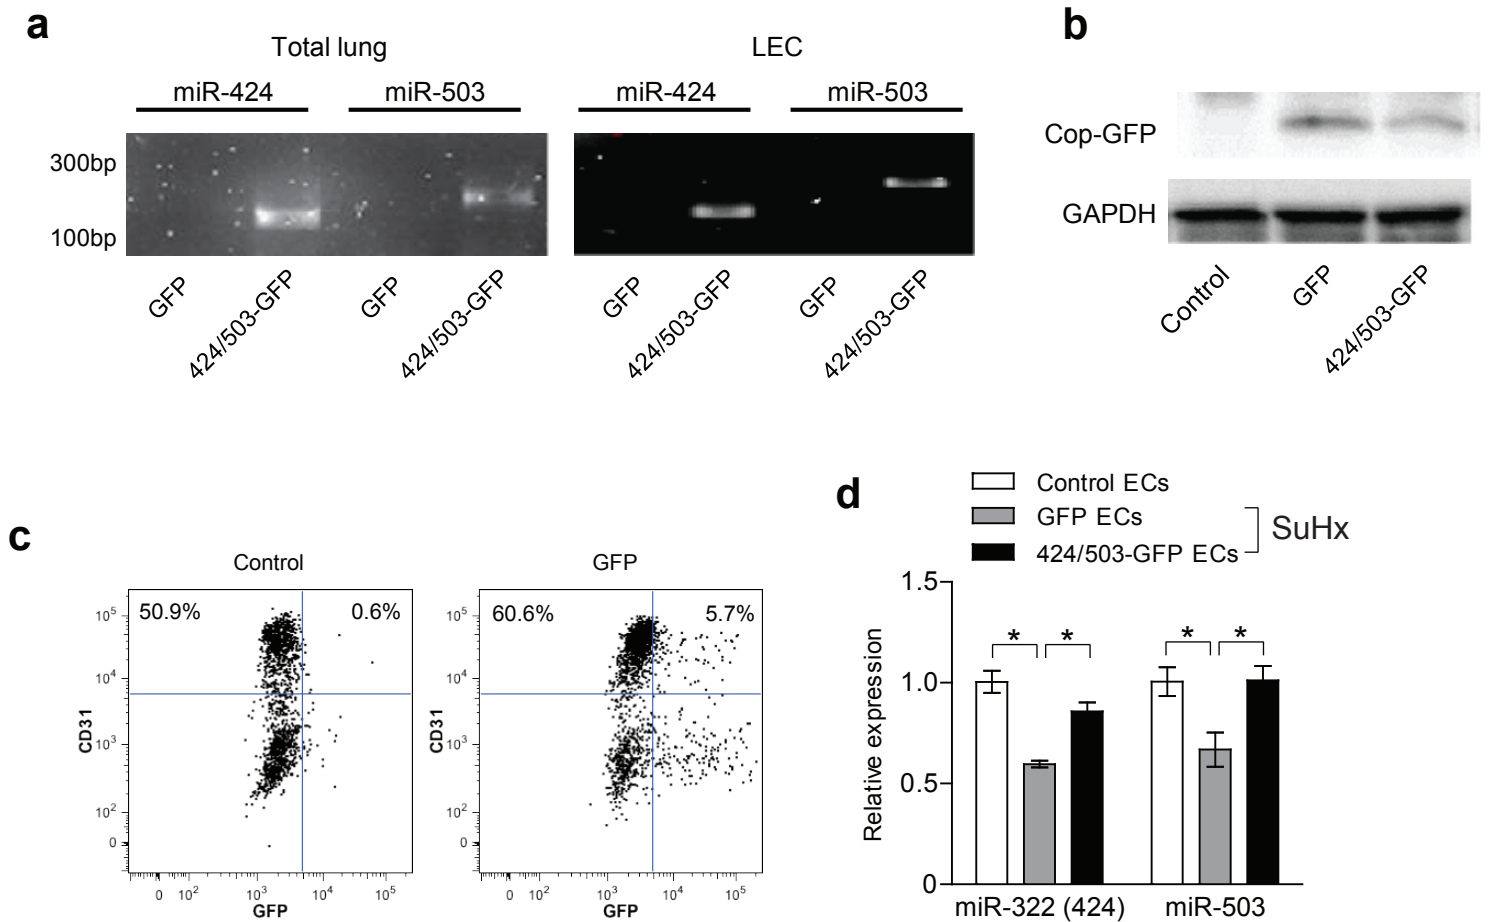

**Supplementary Figure 18.** Validation of intranasal lentiviral miRNA delivery. a) PCR analysis of lentivirally-derived miR-424 and miR-503 transcripts in the lungs and isolated LECs of rats receiving the two lentiviral vectors (GFP control or 424/503-GFP). b) Detection of lentivirally expressed copGFP in lung homogenates of GFP or 424/503-GFP groups. c) Flow cytometry for CD31 and GFP demonstrate LECs that are GFP positive. d) Expression levels of miR-322 (hsa-miR-424 + rno-miR-322) and miR-503 in the isolated LECs of rats receiving GFP control or 424/503-GFP with the SU-5416/hypoxia (SuHx) induced pulmonary hypertension. \* $P < 0.05$ .

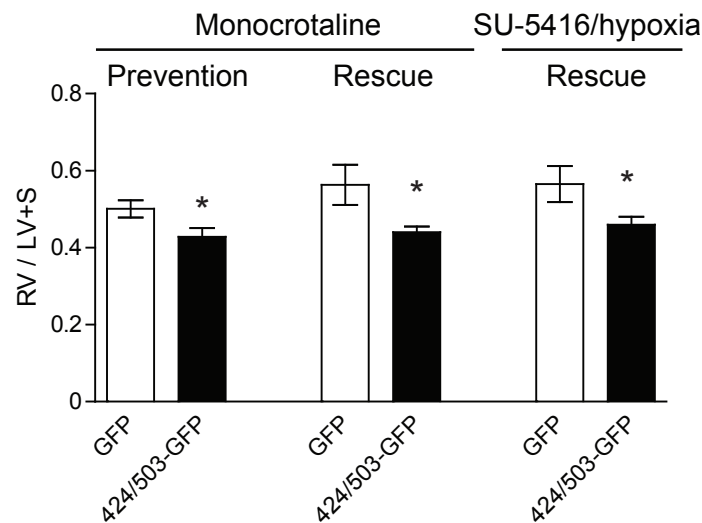

**Supplementary Figure 19.** Right ventricle to left ventricle + septum weight ratios in the rats from the three pulmonary hypertension models. \* $P < 0.05$ .

**Supplementary Table 1. List of microRNAs significantly upregulated or downregulated in all three conditions: 1) *APLN/APLNR* knockdown, 2) *APLN* knockdown, and 3) *APLNR* knockdown.**

| <b>Upregulated</b> | <b>Downregulated</b>                                                                                                                                                                                                                      |
|--------------------|-------------------------------------------------------------------------------------------------------------------------------------------------------------------------------------------------------------------------------------------|
| hsa-miR-27a*       | hsa-miR-23a<br>hsa-miR-95<br>hsa-miR-139-5p<br>hsa-miR-149<br>hsa-miR-200a<br>hsa-miR-210<br>hsa-miR-328<br><b>hsa-miR-424</b><br>hsa-miR-424*<br>hsa-miR-450a<br>hsa-miR-450b-5p<br><b>hsa-miR-503</b><br>hsa-miR-542-5p<br>hsa-miR-551a |

**Supplementary Table 2. Sequences of oligonucleotide primers used.**

|                                   | <b>5' Primer</b>                           | <b>3' Primer</b>                          |
|-----------------------------------|--------------------------------------------|-------------------------------------------|
| <b><i>FGF2</i>- 3'UTR</b>         | TAGGCGATCGCTCGAGCAGACAGAT<br>TAATCCAGAAGC  | TTGCGGCCAGCGGCCGCGGGAGACA<br>AGAAAACACAAA |
| <b><i>FGFR1</i>-3'UTR</b>         | TAGGCGATCGCTCGAGATTGAAGGT<br>GACCTCTGCC    | TTGCGGCCAGCGGCCGCTCTCCCA<br>AGGACTTATGAA  |
| <b>Human miR-424 transcript</b>   | GGCTTCCTTCAGTCATCCAGT                      | ACCTTCTACCTTCCCCACGA                      |
| <b>Human miR-503 transcript</b>   | GGAAGGTAGAAGGTGGGGTC                       | GGAAACAATACCCAGAGCA                       |
| <b>Human miR-424/503 promoter</b> | TTTCTCTATCGATAGGTACCCCATTT<br>TCGAGTGGAGCC | CCGGAATGCCAAGCTTGAGTCAATGA<br>AGGGGGATC   |
